# Supplementary material for: Does bronchoscopy help the diagnosis in COVID-19 infection?
Source: PubMed Central journal article supplement — Eur Respir J. 2020 Aug 6;56(2):2001619. doi: 10.1183/13993003.01619-2020 (PMC7288610; doi:10.1183/13993003.01619-2020), 2020-08-06
Supplement: ERJ-01619-2020.Shareable.pdf [file ERJ-01619-2020.Shareable.pdf]

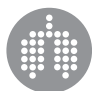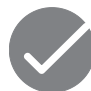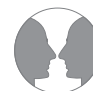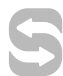

SHAREABLE PDF

# Does bronchoscopy help the diagnosis in COVID-19 infection?

Josuel Ora<sup>1</sup>, Ermanno Puxeddu<sup>1,2</sup>, Francesco Cavalli<sup>1</sup>, Federica Maria Giorgino<sup>1</sup>, Andrea Girolami<sup>1</sup>, Marcello Chiochi<sup>3</sup>, Giaunluigi Sergiacomi<sup>3</sup>, Massimo Federici<sup>4</sup> and Paola Rogliani 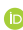<sup>1,2</sup>

**Affiliations:** <sup>1</sup>Division of Respiratory Medicine, University Hospital Tor Vergata, Rome, Italy. <sup>2</sup>Dept of Experimental Medicine, University of Rome Tor Vergata, Rome, Italy. <sup>3</sup>Dept of Diagnostic Imaging, Molecular Imaging, Interventional Radiology and Radiotherapy, University of Rome Tor Vergata, Rome, Italy. <sup>4</sup>Dept of Systems Medicine, University of Rome Tor Vergata, Rome, Italy.

**Correspondence:** Paola Rogliani, Dept of Experimental Medicine, University of Rome Tor Vergata, Via Montpellier 1, 00133, Roma, Italy. E-mail: [paola.rogliani@uniroma2.it](mailto:paola.rogliani@uniroma2.it)

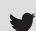

@ERSpublications

**This study evaluates the real value of using bronchoscopy to exclude the diagnosis of COVID-19 in patients with multiple negative nasal/oropharyngeal swabs** <https://bit.ly/2zmSgE8>

**Cite this article as:** Ora J, Puxeddu E, Cavalli F, *et al.* Does bronchoscopy help the diagnosis in COVID-19 infection?. *Eur Respir J* 2020; 56: 2001619 [<https://doi.org/10.1183/13993003.01619-2020>].

This single-page version can be shared freely online.

## To the Editor:

Severe acute respiratory syndrome coronavirus 2 (SARS-CoV-2) is the agent responsible for the recent coronavirus disease 2019 (COVID-19) pandemic. The virus is predominantly spread through large droplets. The clinical features of COVID-19 are varied, ranging from asymptomatic to acute respiratory distress syndrome and multi-organ dysfunction [1].
